# Supplementary material
Source: PubMed Central journal article supplement (PMC4620928)
Supplement: NIHMS721772-supplement-Supplement_1.pdf [file NIHMS721772-supplement-Supplement_1.pdf]

## Supplementary Tables

**Table S1.** Respiratory medication used by GOLD stage

| Medication                    | All patients<br>(n = 4,484) | COPD severity  |                  |                  |                |
|-------------------------------|-----------------------------|----------------|------------------|------------------|----------------|
|                               |                             | 1<br>(n = 794) | 2<br>(n = 1,922) | 3<br>(n = 1,162) | 4<br>(n = 606) |
| No respiratory medication (%) | 34.4                        | 75.3           | 41.9             | 11.2             | 1.7            |
| SABA (%)                      | 52.1                        | 17.8           | 45.0             | 70.3             | 84.8           |
| ICS/LABA (%)                  | 36.0                        | 9.1            | 28.7             | 52.1             | 63.2           |
| LAMA (%)                      | 33.5                        | 6.4            | 24.1             | 50.5             | 66.2           |
| SABA/SAMA (%)                 | 17.0                        | 6.2            | 13.3             | 22.4             | 32.8           |
| ICS (%)                       | 10.6                        | 4.2            | 8.3              | 13.9             | 20.1           |
| SAMA (%)                      | 8.9                         | 1.3            | 6.9              | 13.0             | 17.3           |
| LABA (%)                      | 7.2                         | 1.4            | 4.9              | 10.2             | 16.5           |
| Oral CS (%)                   | 4.8                         | 0.8            | 2.7              | 6.7              | 13.4           |
| Theophylline (%)              | 3.8                         | 0.4            | 1.8              | 4.8              | 12.9           |

Patients may have taking more than one medication.

ICS, inhaled corticosteroid; LABA, long-acting beta2-agonist; LAMA, long-acting muscarinic antagonist; OR, odds ratio; SABA, short-acting beta2-agonist; SAMA, short-acting muscarinic antagonist.

**Table S2.** Number of medications per patient by GOLD stage

| Number of medication | All patients<br>(n=4,484) | COPD severity |                |                |              |
|----------------------|---------------------------|---------------|----------------|----------------|--------------|
|                      |                           | 1<br>(n=794)  | 2<br>(n=1,922) | 3<br>(n=1,162) | 4<br>(n=606) |
| 0                    | 34.4                      | 75.3          | 41.9           | 11.2           | 1.7          |
| 1                    | 13.0                      | 9.9           | 16.0           | 14.2           | 5.3          |
| 2                    | 17.5                      | 8.8           | 18.6           | 22.5           | 15.8         |
| 3                    | 21.8                      | 4.5           | 15.4           | 33.5           | 42.6         |
| 4                    | 8.6                       | 1.0           | 5.7            | 12.8           | 19.6         |
| 5                    | 2.8                       | 0.3           | 1.6            | 3.4            | 8.7          |
| 6                    | 1.1                       | 0             | 0.4            | 1.3            | 4.1          |
| 7                    | 0.6                       | 0.1           | 0.3            | 0.9            | 1.7          |
| 8                    | 0.2                       | 0             | 0.2            | 0.2            | 0.5          |
| 9                    | 0.0                       | 0             | 0              | 0.1            | 0            |
